# Supplementary material for: Oral immune priming with Bacillus thuringiensis induces a shift in the gene expression of Tribolium castaneum larvae
Source: PubMed Central journal article supplement (PMC5405463; doi:10.1186/s12864-017-3705-7), 2017-04-26

A.

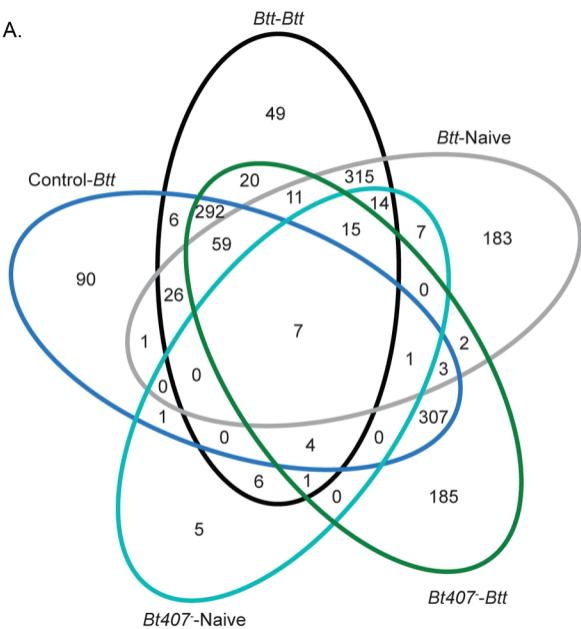

B.

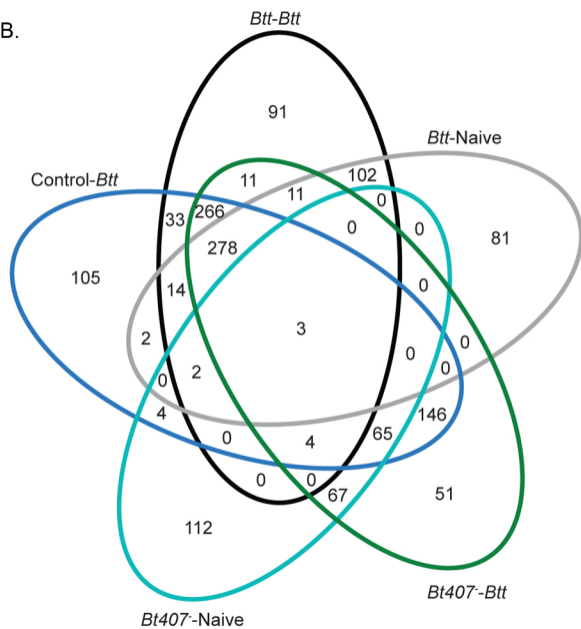

Supplement: 12864_2017_3705_MOESM2_ESM.pdf [file 12864_2017_3705_MOESM2_ESM.pdf]
